# Supplementary material for: Activating SRC/MAPK signaling via 5-HT1A receptor contributes to the effect of vilazodone on improving thrombocytopenia
Source: eLife journal article supplement (doi:10.7554/elife.94765), 2024-02-14

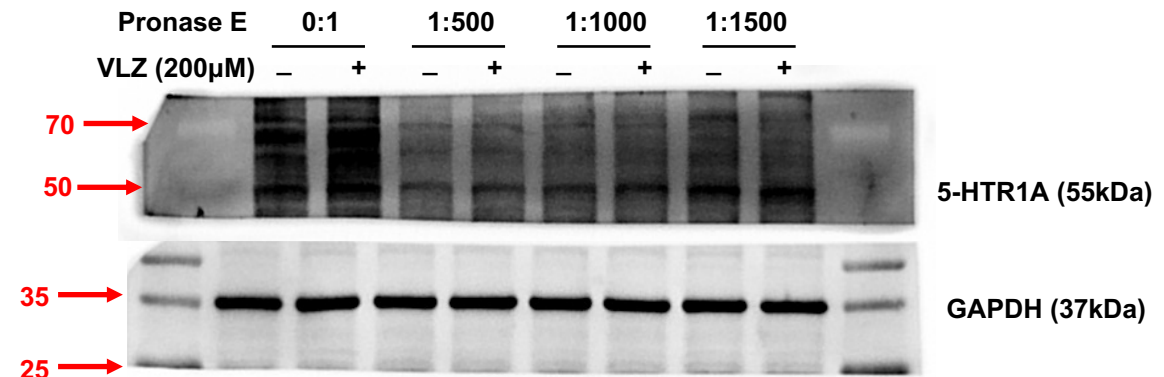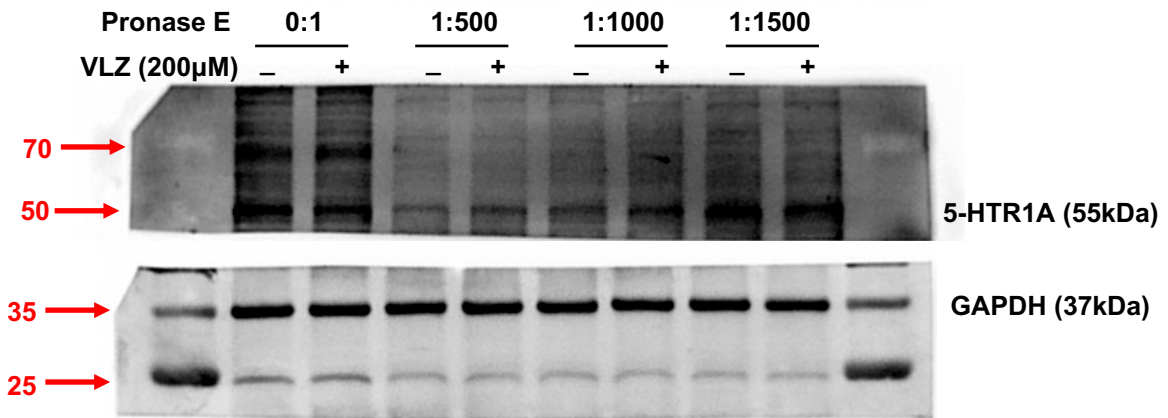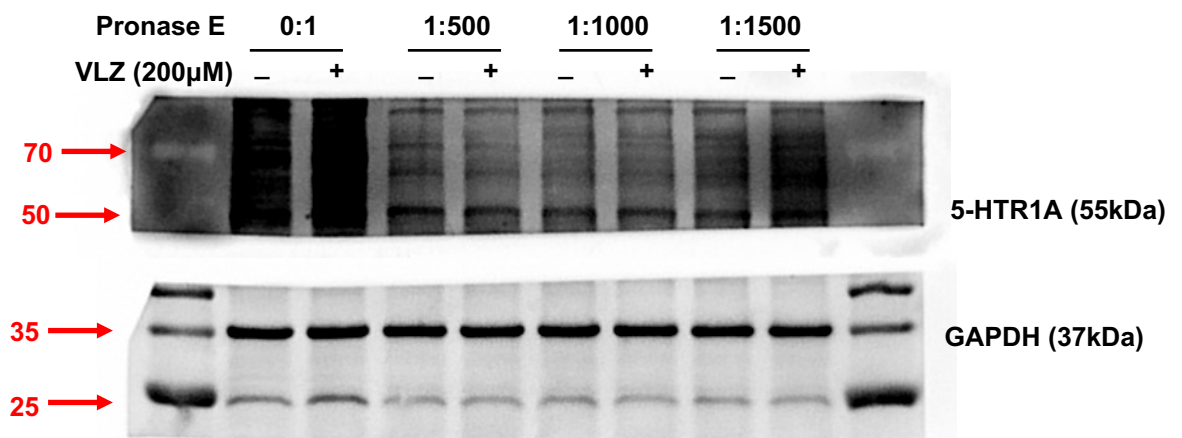

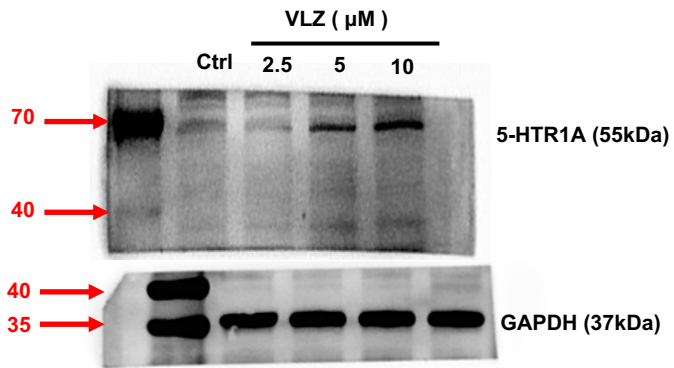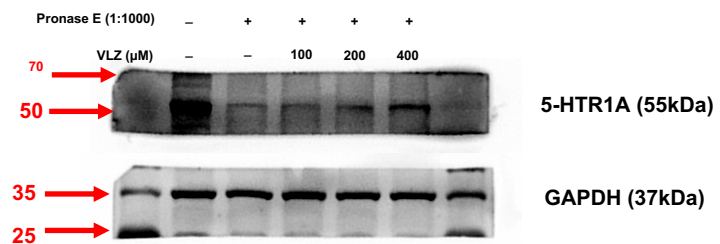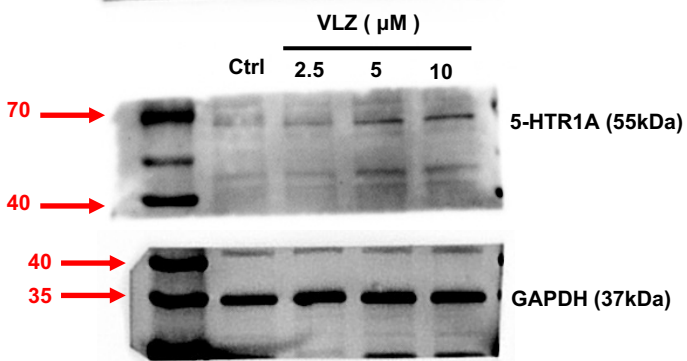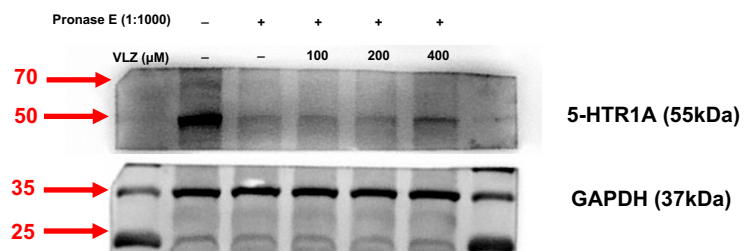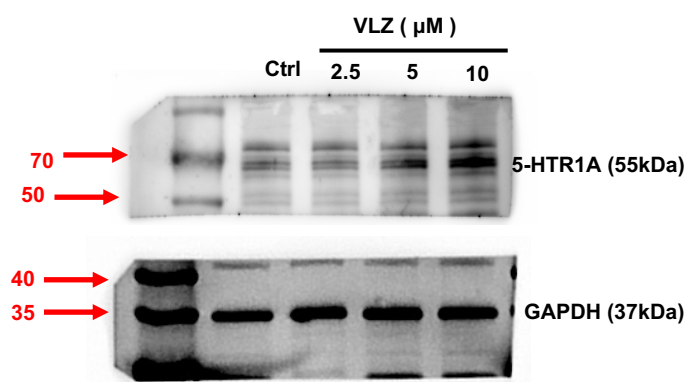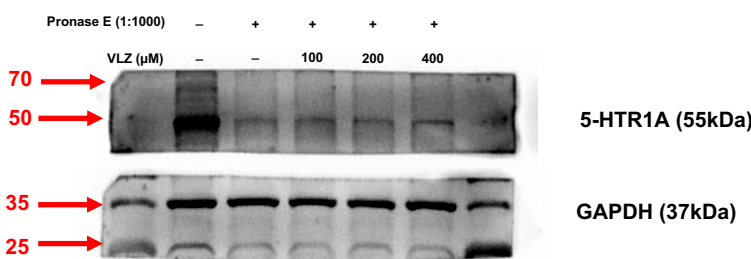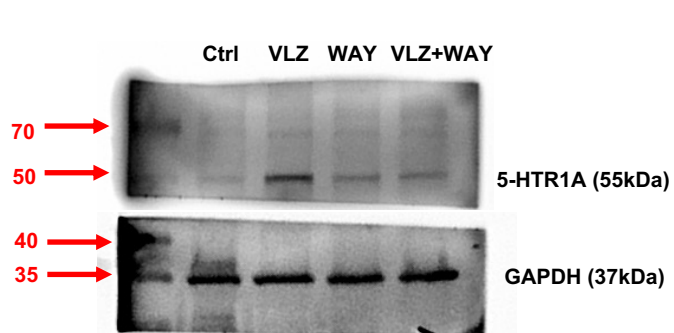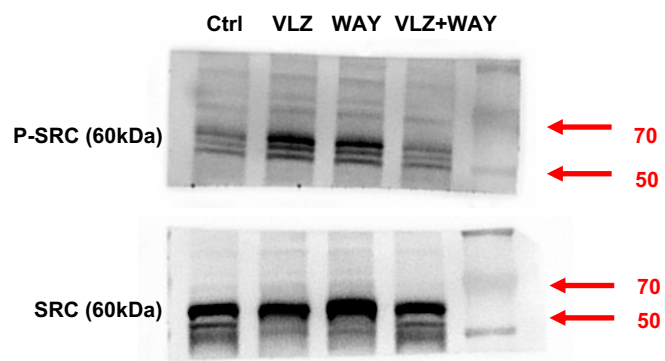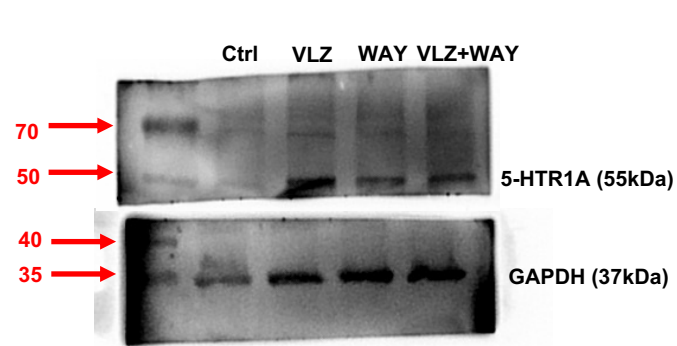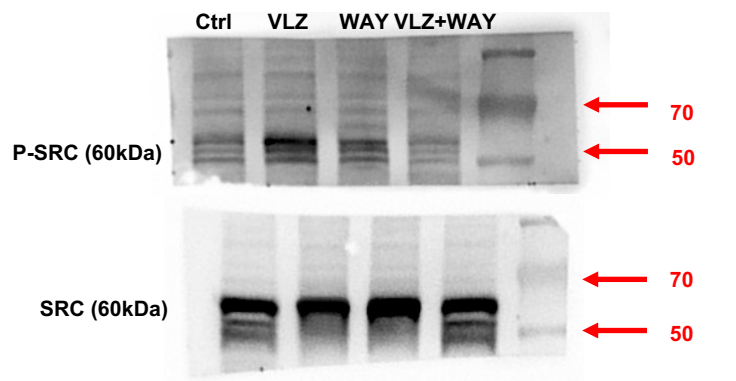

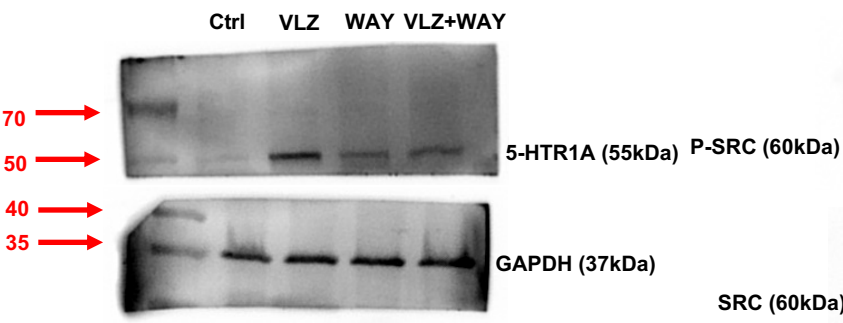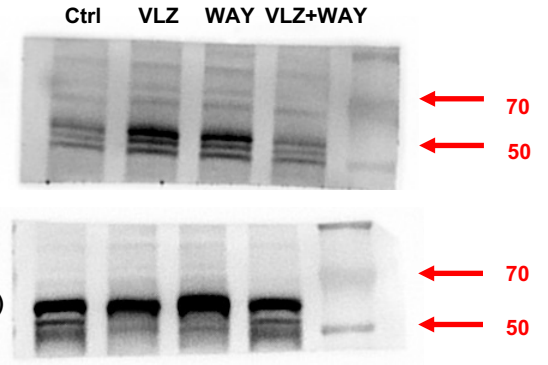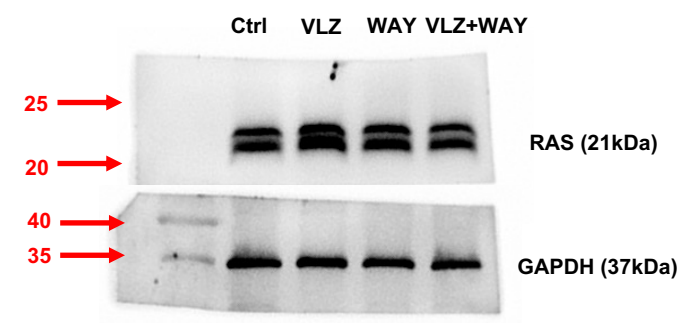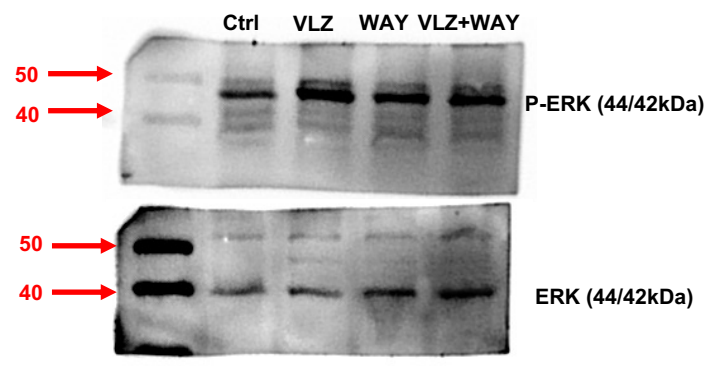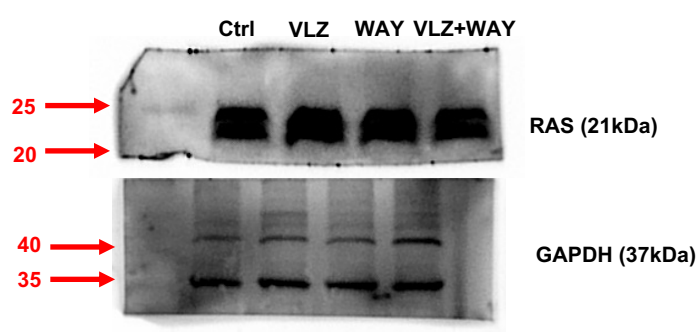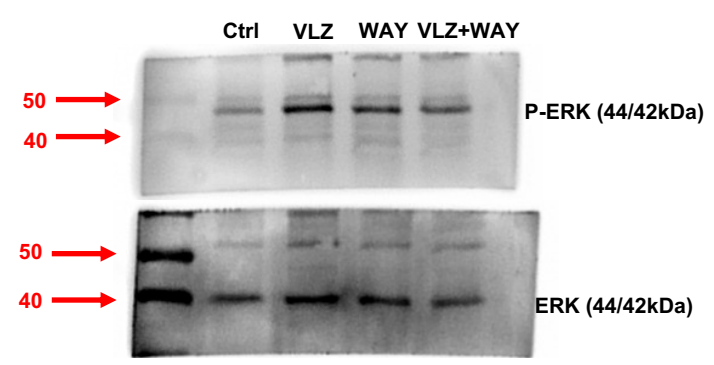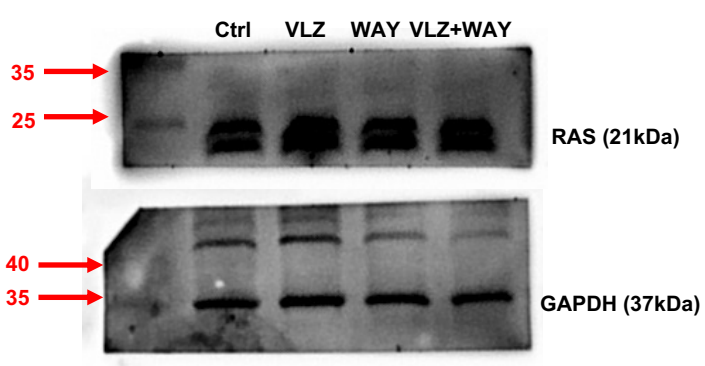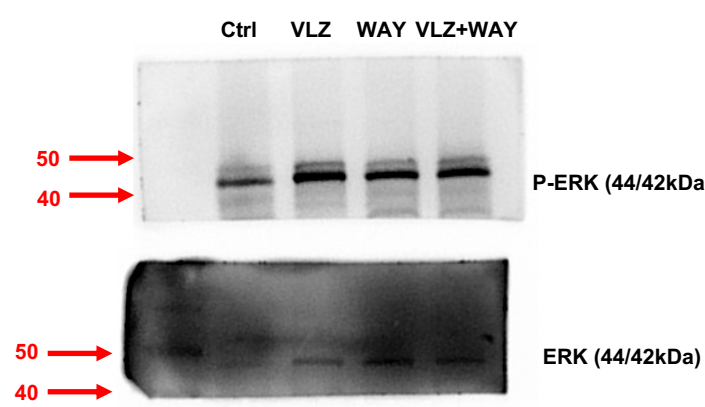

Supplement: fig8-data2 [file elife-94765-fig8-data2-v1.pdf]
